# Supplementary material
Source: MDPI journal article supplement (https://www.mdpi.com/2071-1050/14/3/1463)
Supplement: s1 [file s1 › sustainability-1528891-supplementary.pdf]

Table S1. Exposure and vulnerability indicators across the four sectors used in the construction of the indices.

| Sector      | Risk component | Description                                          | Unit                                                                                                             | Source | Year               |
|-------------|----------------|------------------------------------------------------|------------------------------------------------------------------------------------------------------------------|--------|--------------------|
| Agriculture | Exposure       | Farms                                                | Number of family farms as a percentage of the total number of households                                         | [1, 2] | 2008-2009          |
|             |                |                                                      | Number of animals (cattle, sheep, goats, pigs) per farm on average                                               |        | 2008-2009          |
|             |                |                                                      | Agricultural land as a percentage of the total area of the district                                              |        | 2008 and 2018-2019 |
|             |                | People employed on farms                             | Number of hired workers on farms (2008) as a percentage of the total population (2012)                           | [1, 2] | 2008 and 2012      |
|             |                | Small-holders                                        | Number of farms with less than 2 ha of agricultural land as a percentage of all farms                            | [1, 3] | 2008-2009          |
|             |                | Low-income people                                    | Percentage of population whose income is less than half of GNI per capita of the district (2009)                 | [4]    | 2009               |
|             | Vulnerability  | Food insecure people                                 | Percentage of children under the age of 5 that are stunted (-2 SD) (2018)                                        | [5, 6] | 2018               |
|             |                |                                                      | Percentage of children under the age of 5 that are wasted (-2 SD) (2018)                                         |        |                    |
|             |                | Education of farmers                                 | Number of family farms with the farmer having received no formal education as a percentage of all family farms   | [1]    | 2008-2009          |
|             |                | Irrigation infrastructure                            | Inverted number of farms with irrigation infrastructure as a percentage of the total number of farms             | [1]    | 2008               |
| Water       | Exposure       | Population not using improved drinking water sources | Number of households not using improved drinking water sources as a percentage of the total number of households | [5]    | 2018               |

| Sector   | Risk component | Description                                | Unit                                                                                                                                   | Source     | Year          |
|----------|----------------|--------------------------------------------|----------------------------------------------------------------------------------------------------------------------------------------|------------|---------------|
|          |                | People with in-adequate water availability | Number of households without drinking water available in sufficient quantities as a percentage of the total number of households       | [5]        | 2018          |
|          |                | People with in-adequate access to water    | Number of household members as a percentage of the total number of household members without access to drinking water on premises      | [5]        | 2018          |
|          | Vulnerability  | Un-sustainable water supply                | Inverted<br>SWM and DWV water production (m3/day) per capita                                                                           | [2, 7]     | 2015 and 2012 |
|          |                | Storage capacity                           | Inverted storage capacity (m3/day) per capita                                                                                          | [2, 7]     | 2017 and 2012 |
|          |                | Alternative water resources                | Number of households which main source of drinking water is not rainwater collection as a percentage of the total number of households | [5]        | 2018          |
| Forestry | Exposure       | Coastal forests                            | Area of mangroves as a percentage of the total area of the district                                                                    | [8]<br>[2] | 2018          |
|          |                | Savanna forest and peat (swamp) areas      | Area of open savanna and swamp as a percentage of the total area of the district                                                       | [9]        | 2017          |
|          |                | Forest cover                               | Area of forest (excluding savannas and swamps) as a percentage of the total area of the district                                       | [9]        | 2017          |
|          | Vulnerability  | Land tenure                                | Number of Amerindian and Maroon settlements per km <sup>2</sup> district area                                                          | [2, 10]    | No date       |
|          |                | Deforesta-tion                             | Deforested area between 2000 and 2015 as a percentage of the total forested area                                                       | [10]       | 2000          |

| Sector         | Risk component | Description                | Unit                                                                            | Source  | Year          |
|----------------|----------------|----------------------------|---------------------------------------------------------------------------------|---------|---------------|
|                |                | Existing degradation       | Volume (m³) of roundwood produced per km² forest                                | [9, 11] | 2018 and 2017 |
| Infrastructure | Exposure       | Infrastructure             | Km of road per km² area                                                         | [12]    | 2018          |
|                |                |                            | Number of bridges per km² area                                                  | [12]    | 2018          |
|                |                |                            | Number of certified harbors per capita (x 100.000)                              | [7]     | 2017          |
|                |                |                            | Number of electricity connections as a percentage of the total number of people | [2]     | 2018 and 2012 |
|                |                | Coastlines                 | Coastline (km) per area (km2)                                                   | [2]     | 2020          |
|                |                |                            |                                                                                 | [13]    |               |
|                |                | People                     | Number of people as a percentage of the total population in Suriname            | [2]     | 2012          |
|                |                | Weather resistant building | Percentage of dwellings without finished roof                                   | [7]     | 2018          |
|                |                |                            | Percentage of dwellings without finished walls                                  |         |               |
|                |                |                            | Length of non-novel roads as a percentage of all roads                          | [12]    | 2018          |
|                |                |                            | Number of non-novel bridges as a percentage of all bridges                      | [12]    | 2018          |
|                |                | Education                  | Inverted primary completion rate                                                | [6]     | 2018          |

1. Ministry of Agriculture, Livestock and Fisheries; Eindrapport van de Vijfde Landbouwtelling 2008-2009. **N.d.**
2. General Bureau of Statistics; Table of Statistical Yearbook 2018-2019. **N.d.**
3. Lowder, S. K.; Sánchez, M. V.; Bertini, R; Farms, family farms, farmland distribution and farm labour: What do we know today? *FAO Agricultural Development Economics Working Paper 19-08*. **2019**, doi: 10.22004/ag.econ.301283
4. United Nations Development Program (UNDP); Human Development Atlas Suriname. **2013**.
5. Ministry of Social Affairs and Public Housing; Suriname Multiple Indicator Cluster Survey 2018, Survey Findings Report. **2019**.
6. Ministry of Social Affairs and Public Housing. Snapshots of Suriname Multiple Indicator Cluster Survey 2018, Snapshots of Survey Findings Report. **2020**.
7. General Bureau of Statistics; 8th Environmental Statistics Publication. **2018**.
8. Foundation for Forestry and Forest Supervision; The contribution of Suriname's NFMS to BC NDC. **2019**.
9. Foundation for Forestry and Forest Supervision; SURINAAMSE BOSBOUWSECTOR 2017. **2019**.
10. Foundation for Forestry and Forest Supervision; Technical report: Forest cover monitoring in Suriname using remote sensing techniques for the period 2000-2015. **2017**.
11. Foundation for Forestry and Forest Supervision; Forestry Statistics. Production, export and import of timber and timber product in 2018. **2017**.
12. General Bureau of Statistics; Traffic and Transport Statistics 2015-2018. **2019**.
13. National Institute for Environment and Development; National Land Monitoring System of Suriname. **2020**.
